# Supplementary material
Source: publisher figshare collection journal article supplement (https://tandf.figshare.com/ndownloader/files/14830994)
Supplement: Supplementary file 1 [file 14830994]

## SUPPLEMENTARY MATERIAL

### Two new compounds from the marine sponge derived fungus

#### *Penicillium chrysogenum*

Xiao Han<sup>a,b</sup>, Pinglin Li<sup>a,b</sup>, Xiangchao Luo<sup>a,b</sup>, Dan Qiao<sup>a,b</sup>, Xuli Tang<sup>c,\*</sup> and Guoqiang Li<sup>a,b,\*</sup>

<sup>a</sup> School of Medicine and Pharmacy, Ocean University of China, Qingdao 266003, China

<sup>b</sup> Laboratory of Marine Drugs and Biological Products, National Laboratory for Marine Science and Technology, Qingdao 266235, China

<sup>c</sup> College of Chemistry and Chemical Engineering, Ocean University of China, Qingdao 266100, China

\*Corresponding author.

E-mail address: tangxuli@ouc.edu.cn, liguoqiang@ouc.edu.cn

Two new compounds (**1** and **2**) were isolated from the marine sponge derived fungus *Penicillium chrysogenum* by using various column chromatography techniques. Their structures were elucidated by extensive analysis of spectroscopic data and quantum chemical calculation. Compound **1** exhibited moderate activity against PTP1B with  $2.95 \pm 0.97\%$  at the concentration of  $30 \mu\text{mol} \cdot \text{L}^{-1}$ .

**Keywords:** Marine sponge; Fungus; *Penicillium chrysogenum*; PTP1B activity

## **List of content**

**Table S1.**  $^1\text{H}$  NMR (500 MHz,  $\text{CDCl}_3$ ) and  $^{13}\text{C}$  NMR (150 MHz,  $\text{CDCl}_3$ ) data for compound **1**

**Table S2.**  $^1\text{H}$  NMR (500 MHz,  $\text{CDCl}_3$ ) and  $^{13}\text{C}$  NMR (150 MHz,  $\text{CDCl}_3$ ) data for compound **2**

**Figure S1.** Key COSY and HMBC correlations of compound **1** and **2**

**Figure S2.** The experimental CD and calculated ECD spectrum of compound **1** and **2**

**Figure S3.** HRESIMS spectrum of compound **1**

**Figure S4.**  $^1\text{H}$  NMR spectrum of compound **1** in  $\text{CDCl}_3$

**Figure S5.**  $^{13}\text{C}$  NMR spectrum of compound **1** in  $\text{CDCl}_3$

**Figure S6.** HSQC spectrum of compound **1** in  $\text{CDCl}_3$

**Figure S7.** HMBC spectrum of compound **1** in  $\text{CDCl}_3$

**Figure S8.** HRESIMS spectrum of compound **2**

**Figure S9.**  $^1\text{H}$  NMR spectrum of compound **2** in  $\text{CDCl}_3$

**Figure S10.**  $^{13}\text{C}$  NMR spectrum of compound **2** in  $\text{CDCl}_3$

**Figure S11.** HSQC spectrum of compound **2** in  $\text{CDCl}_3$

**Figure S12.** HMBC spectrum of compound **2** in  $\text{CDCl}_3$

**Figure S13.** NOE spectrum of compound **2** in  $\text{CDCl}_3$

**Table S1**  $^1\text{H}$  NMR (500 MHz,  $\text{CDCl}_3$ ) and  $^{13}\text{C}$  NMR (150 MHz,  $\text{CDCl}_3$ ) data for compound **1**

| Position | $\delta_{\text{H}}$ , mult. (J in Hz) | $\delta_{\text{C}}$ , Type |
|----------|---------------------------------------|----------------------------|
| 1        |                                       | 202.4, s                   |
| 2        |                                       | 81.3, s                    |
| 3        |                                       | 198.9, s                   |
| 4        |                                       | 123.8, s                   |
| 5        | 7.35, s                               | 136.7, d                   |
| 6        |                                       | 104.8, s                   |
| 7        |                                       | 173.1, s                   |
| 8        | 7.42, dd (14.3, 10.2)                 | 144.1, d                   |
| 9        | 6.41, d (14.7)                        | 116.9, d                   |
| 10       | 6.35, d (15.3)                        | 130.6, d                   |
| 11       | 6.29, m                               | 141.9, d                   |
| 12       | 1.93, d (5.4)                         | 19.0, q                    |
| 13       | 1.55, s                               | 30.1, q                    |
| 14       | 1.99, s                               | 15.7, q                    |
| OH-2     | 5.43, s                               |                            |
| OH-7     | 3.49, s                               |                            |

**Table S2**  $^1\text{H}$  NMR (500 MHz,  $\text{CDCl}_3$ ) and  $^{13}\text{C}$  NMR (150 MHz,  $\text{CDCl}_3$ ) data for compound **2**

| Position | $\delta_{\text{H}}$ , mult. (J in Hz) | $\delta_{\text{C}}$ , Type |
|----------|---------------------------------------|----------------------------|
| 1        |                                       | 204.9, s                   |
| 2        | 4.45, dd (12.5, 8.7)                  | 64.4, d                    |
| 3        | 2.24, m                               | 40.5, d                    |
| 4        | 3.24, dd (11.2, 6.2)                  | 34.0, t                    |
| 5        | 1.25, d (6.5)                         | 17.5, q                    |
| 6-NH     | 5.67, s                               |                            |
| 7        |                                       | 170.9, s                   |
| 8        | 2.08, s                               | 23.4, q                    |

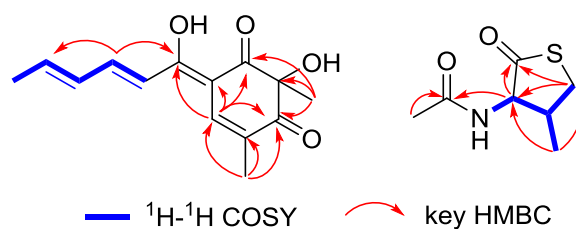**Figure S1** Key COSY and HMBC correlations of compound **1** and **2**

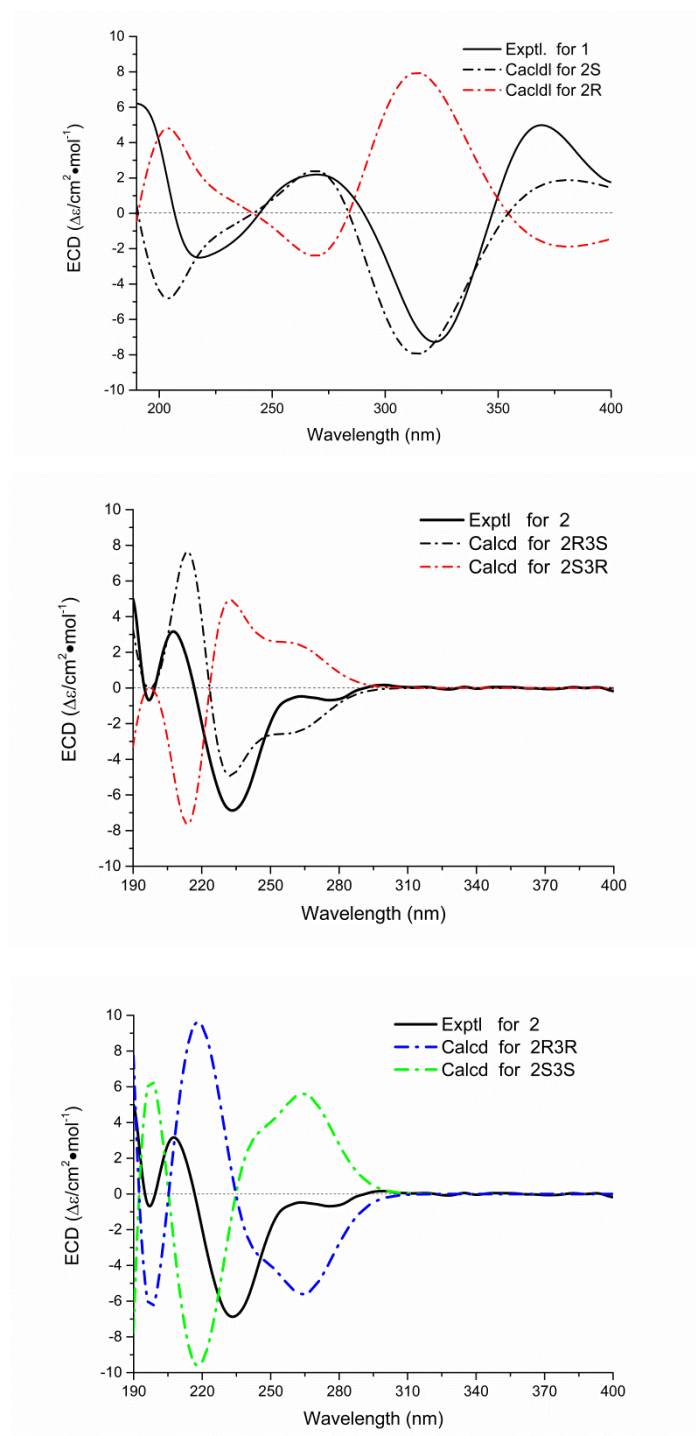

**Figure S2** The experimental CD and calculated ECD spectrum of compound **1** and **2**

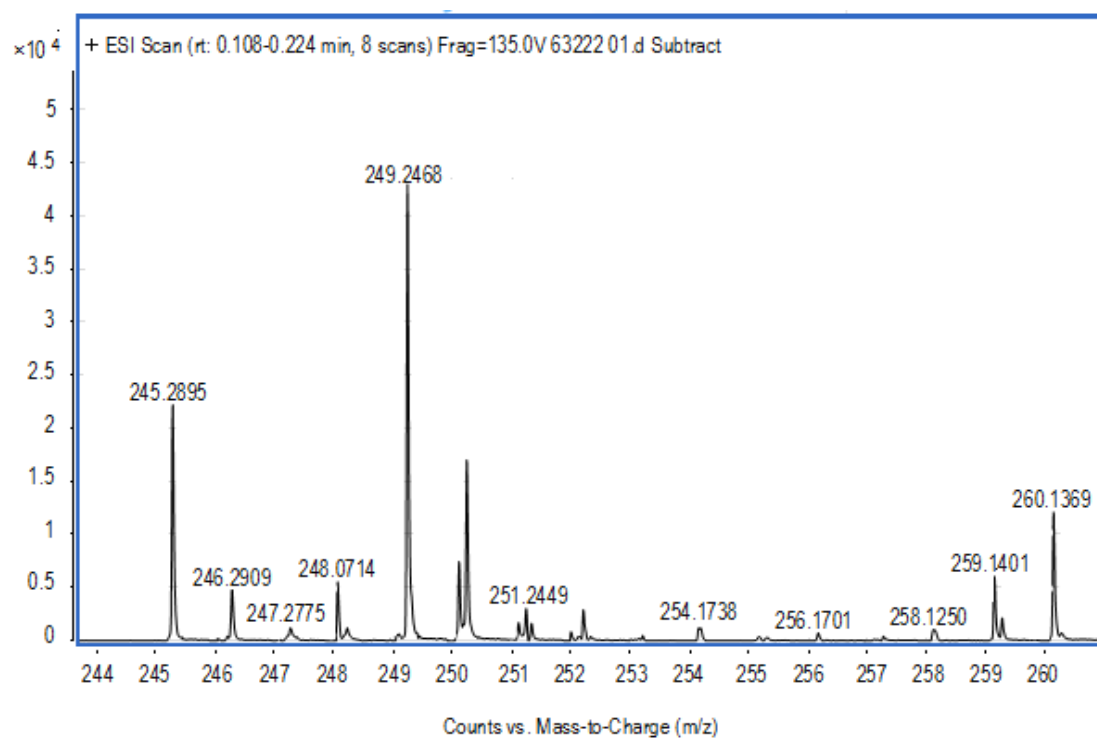

**Figure S3** HRESIMS spectrum of compound **1**

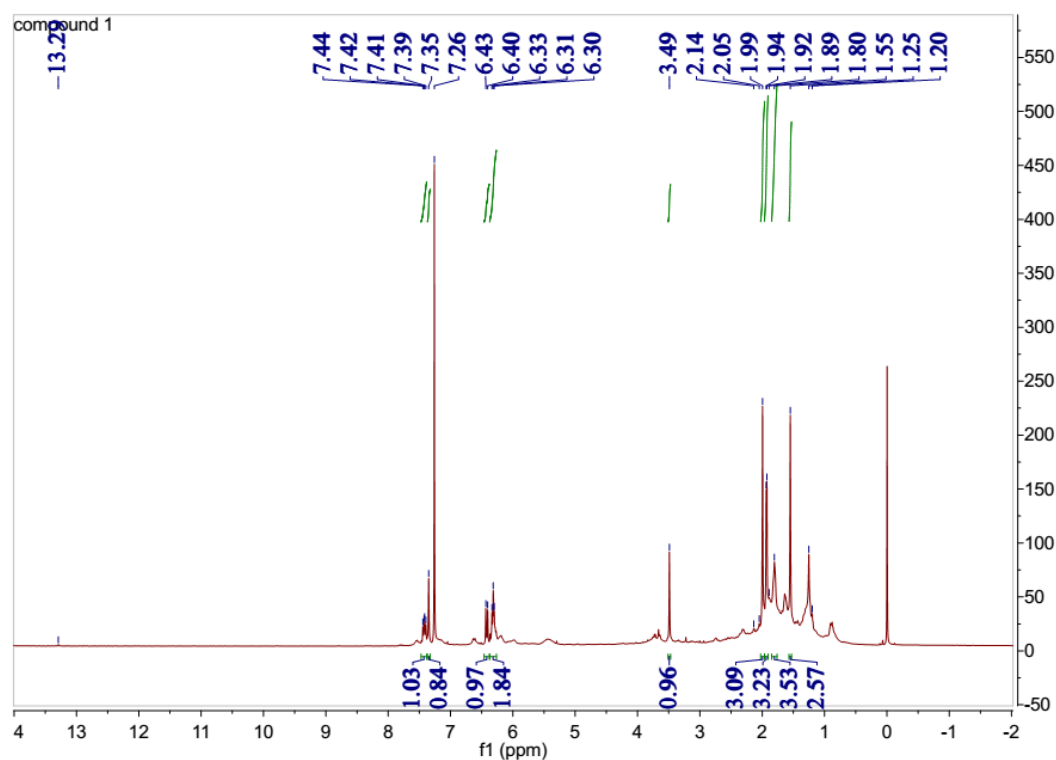

**Figure S4** <sup>1</sup>H NMR spectrum of compound **1** in CDCl<sub>3</sub>

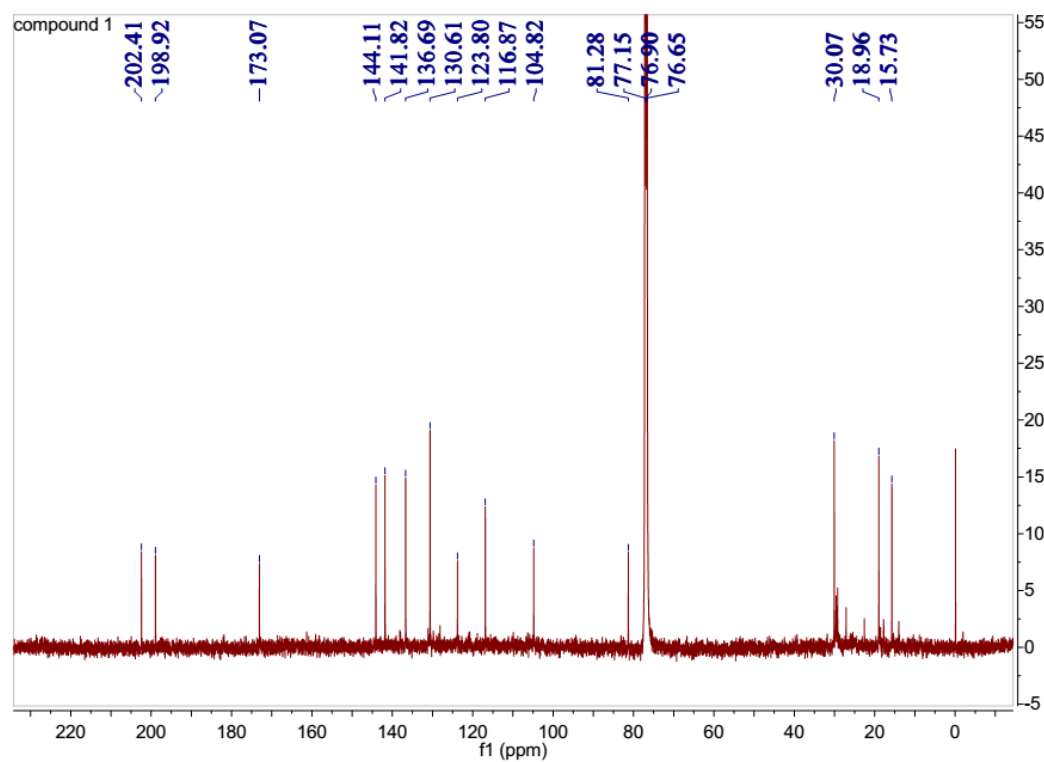

**Figure S5**  $^{13}\text{C}$  NMR spectrum of compound **1** in  $\text{CDCl}_3$

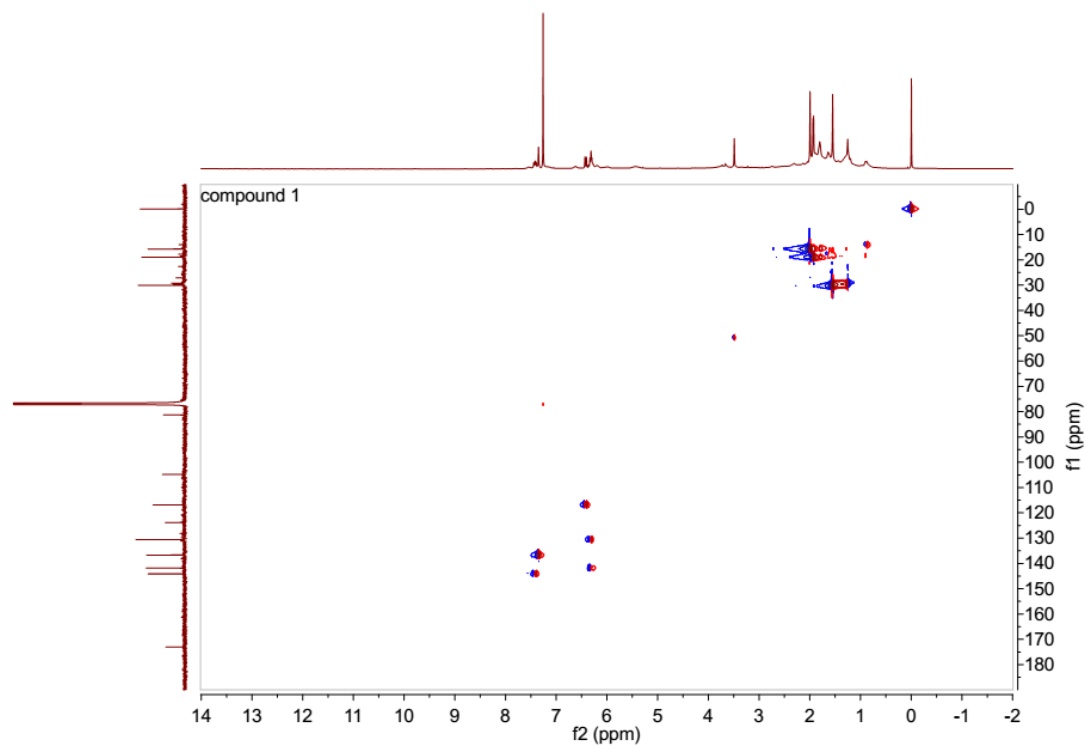

**Figure S6** HSQC spectrum of compound **1** in  $\text{CDCl}_3$

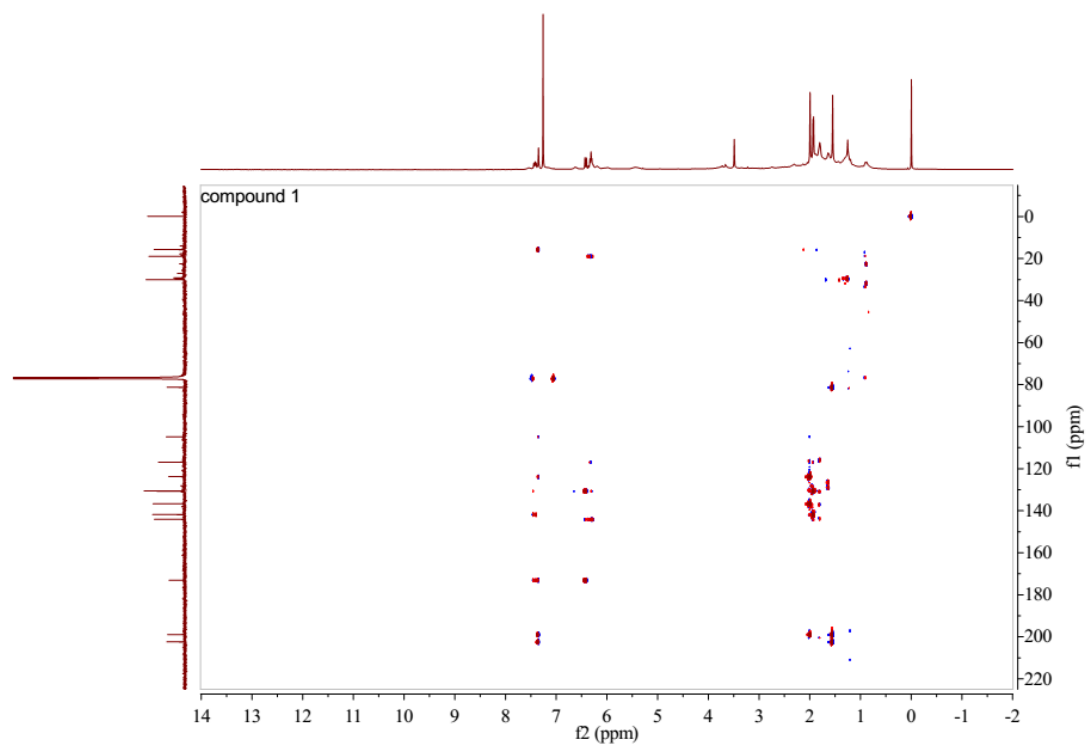

**Figure S7** HMBC spectrum of compound **1** in  $\text{CDCl}_3$

20181016-X-2281\_181016111020 #56 RT: 0.46 AV: 1 NL: 4.74E6

T: FTMS + p ESI Full ms [150.00-2000.00]

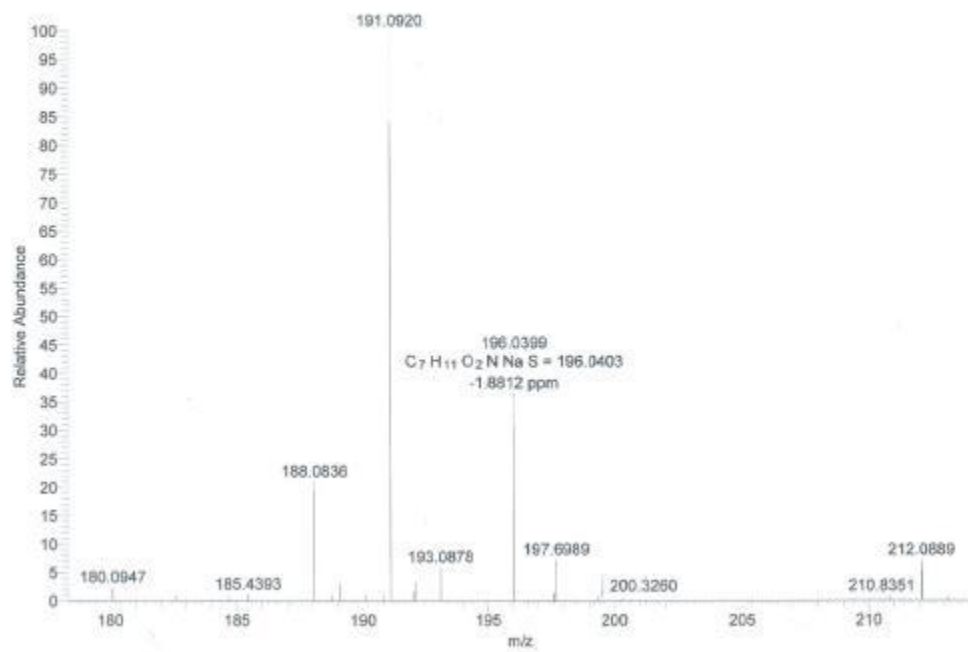

**Figure S8** HRESIMS spectrum of compound **2**



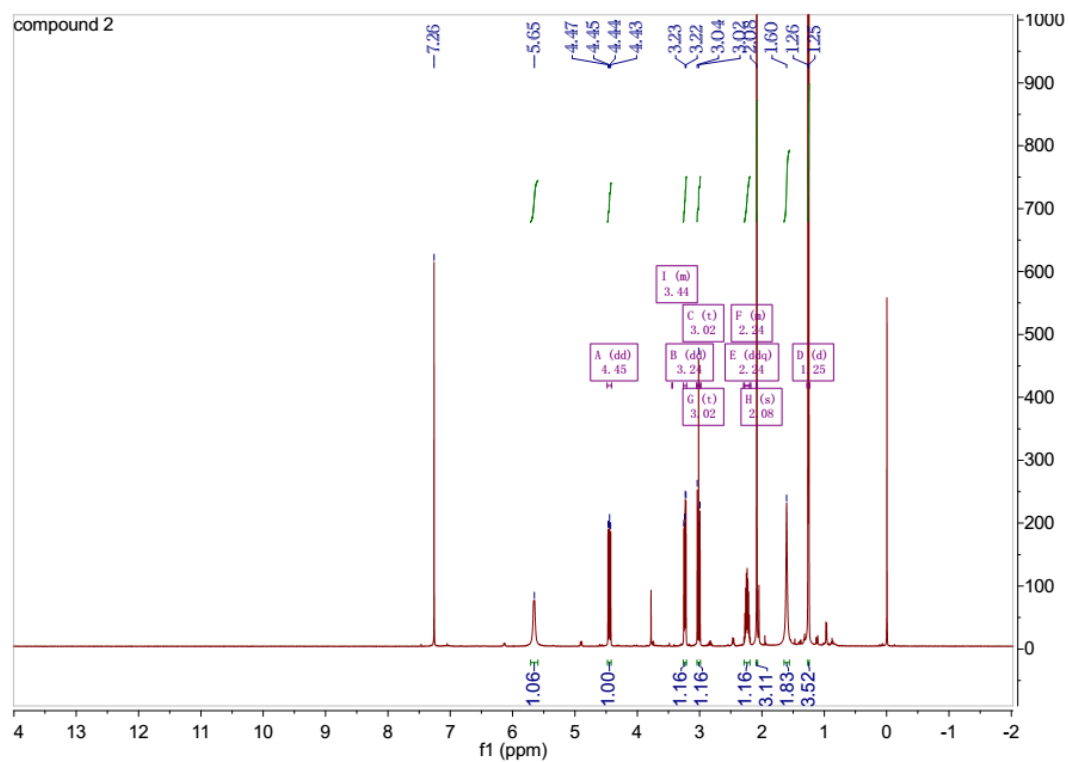

**Figure S9**  $^1\text{H}$  NMR spectrum of compound **2** in  $\text{CDCl}_3$

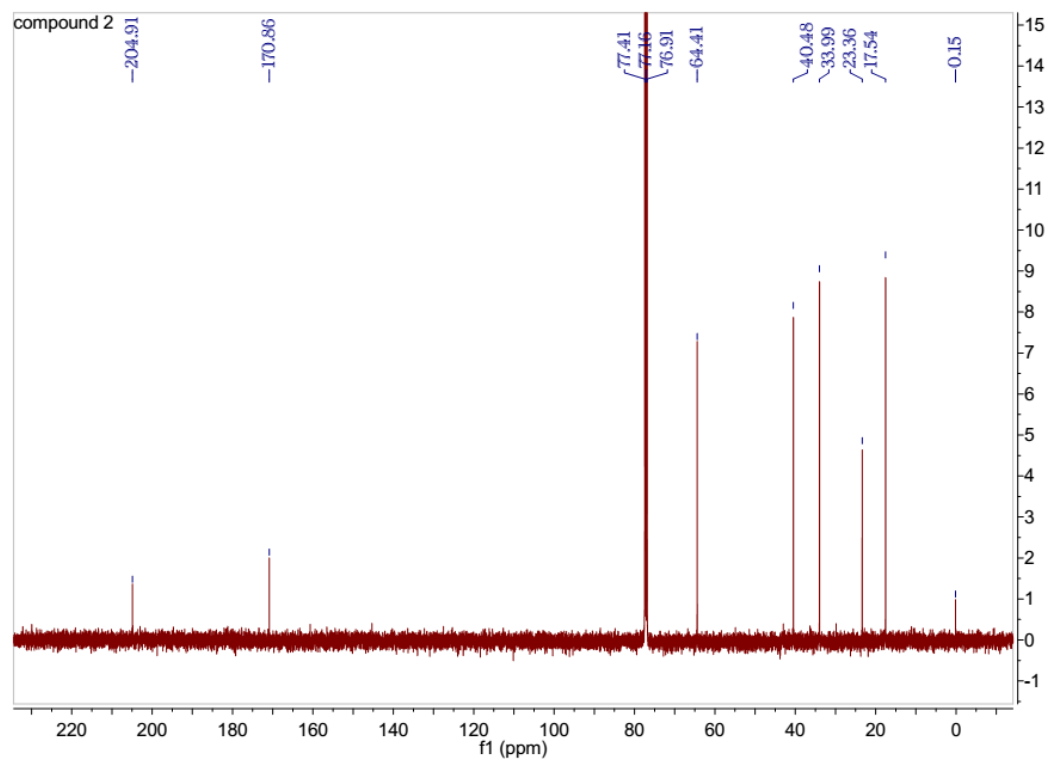

**Figure S10**  $^{13}\text{C}$  NMR spectrum of compound **2** in  $\text{CDCl}_3$

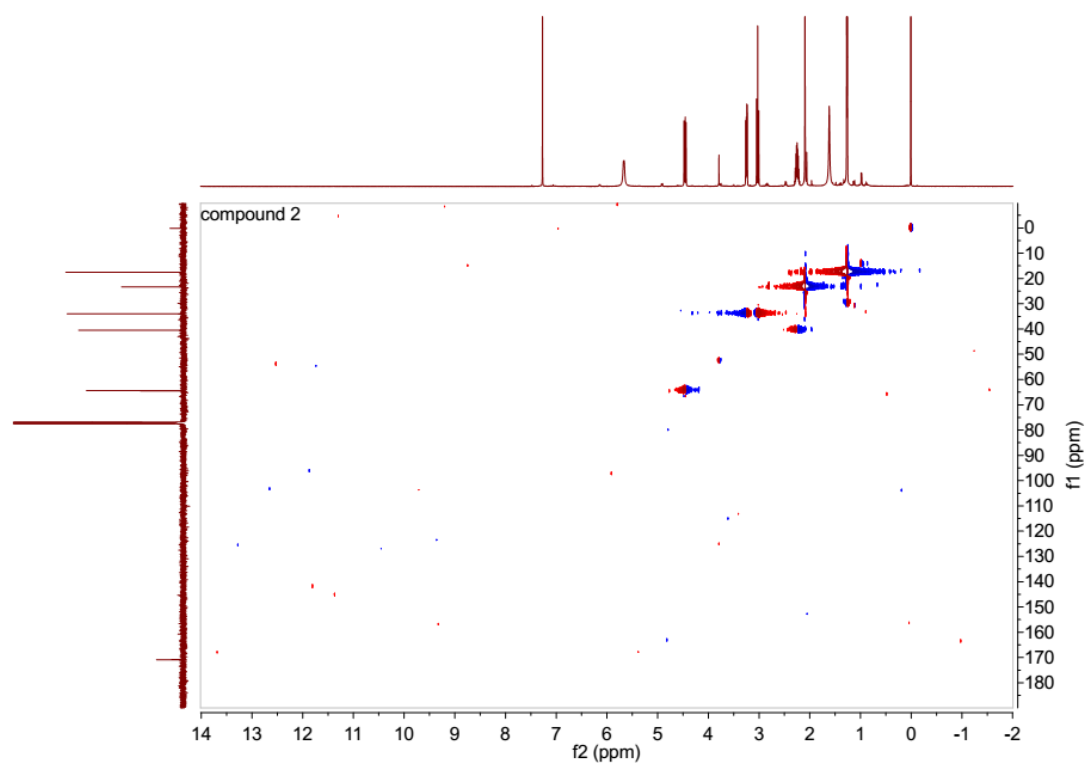

**Figure S11** HSQC spectrum of compound **2** in CDCl<sub>3</sub>

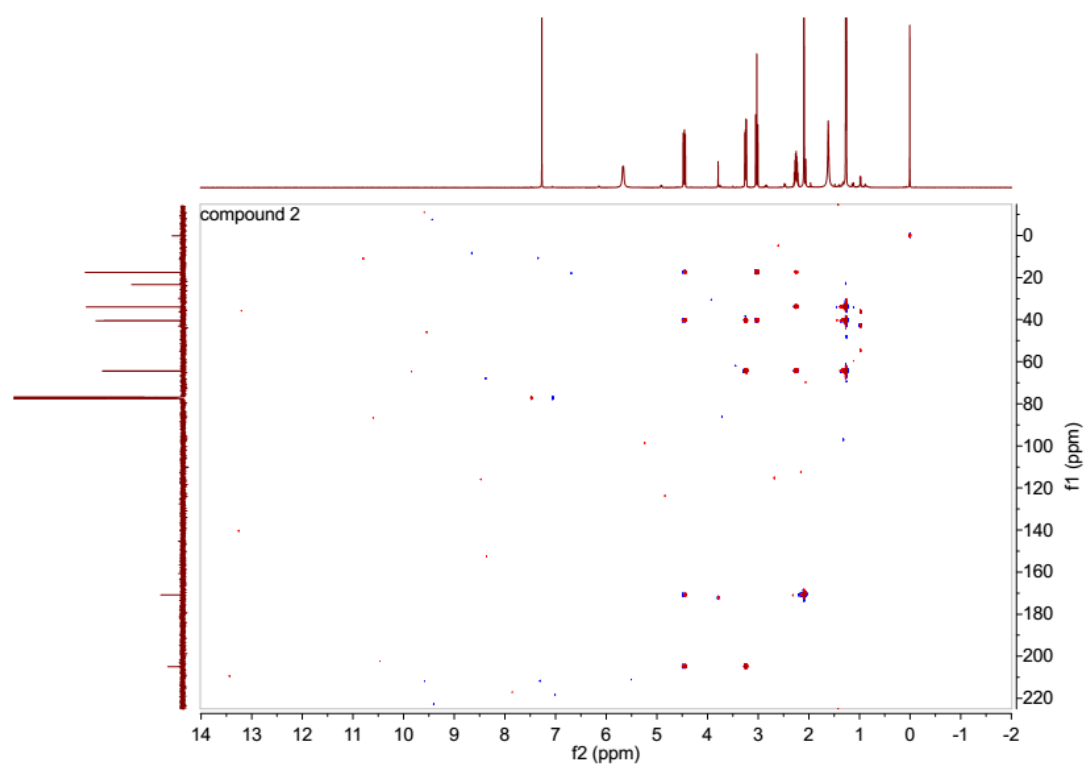

**Figure S12** HMBC spectrum of compound **2** in CDCl<sub>3</sub>

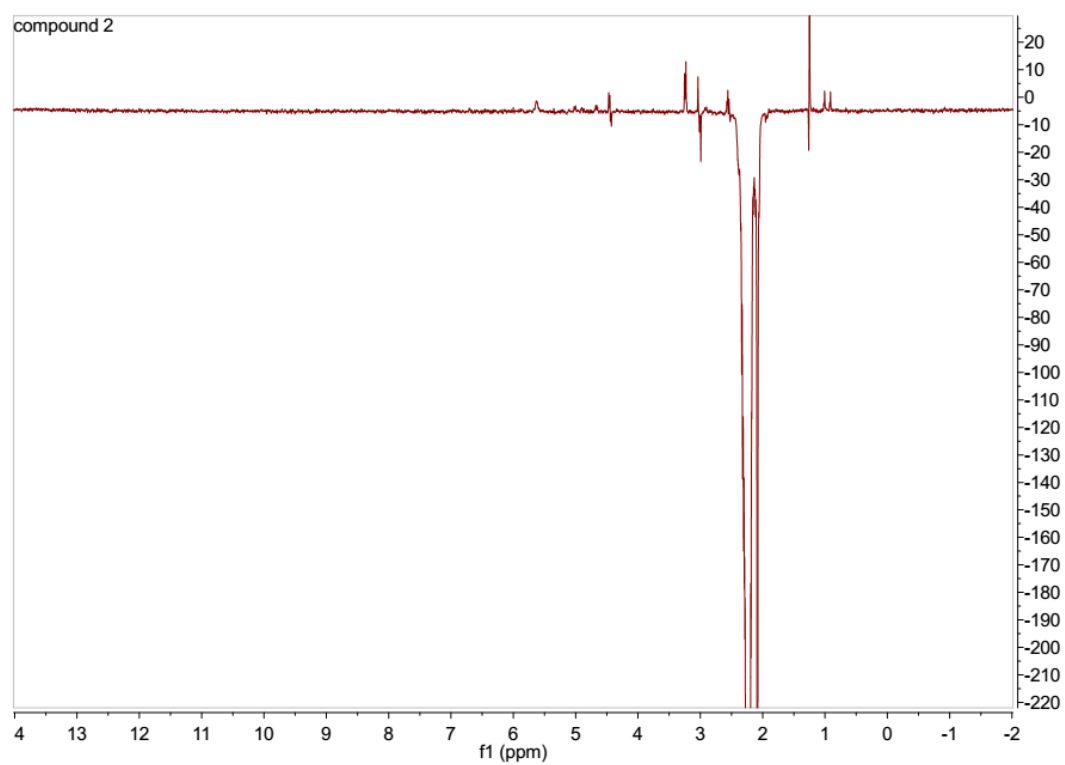

**Figure S13** NOE spectrum of compound **2** in  $\text{CDCl}_3$
